# Supplementary material for: Molecular and Phytochemical Variability of Endemic Juniperus sabina var. balkanensis from Its Natural Range
Source: MDPI journal article supplement (doi:10.3390/d14121062), 2022-12-02
Supplement: s1 [file s1]

Supplemental Table S1. Chemical composition of leaf essential oil of analysed *Juniperus sabina* var. *balkanensis* from the Balkans

| #  | Compound                                 | LRI  | Velebit<br>n=16 | Biokovo<br>n=5 | Prokletije<br>n=19 | Korab<br>n=15 | Bistra<br>n=15 | Resava<br>n=18 | Balkan<br>n=13 |
|----|------------------------------------------|------|-----------------|----------------|--------------------|---------------|----------------|----------------|----------------|
| 1  | Tricyclene                               | 919  | 0.1 ± 0.2       | 0.4 ± 0.4      | tr                 | tr            | -              | -              | -              |
| 2  | α-Thujene                                | 922  | 0.3 ± 0.3       | 1.0 ± 0.3      | 0.5 ± 0.3          | 0.7 ± 0.2     | 0.8 ± 0.3      | 0.4 ± 0.7      | 0.7 ± 0.3      |
| 3  | α-Pinene                                 | 929  | 1.0 ± 0.7       | 2.9 ± 0.3      | 1.7 ± 0.6          | 2.1 ± 1.1     | 2.3 ± 0.5      | 1.2 ± 0.6      | 1.9 ± 0.8      |
| 4  | Camphene                                 | 944  | tr              | 0.3 ± 0.3      | tr                 | tr            | -              | -              | -              |
| 5  | Sabinene                                 | 969  | 7.8 ± 12.6      | 23.5 ± 9.8     | 21.3 ± 17.9        | 31.7 ± 13.1   | 18.6 ± 10.3    | 4.3 ± 6.9      | 29.4 ± 13.2    |
| 6  | β-Pinene                                 | 973  | tr              | 0.3 ± 0.0      | 0.2 ± 0.1          | 0.2 ± 0.1     | 0.2 ± 0.1      | 0.2 ± 0.2      | 0.2 ± 0.1      |
| 7  | Myrcene                                  | 989  | 1.1 ± 1.4       | 3.3 ± 0.5      | 2.5 ± 0.7          | 2.7 ± 0.7     | 2.6 ± 0.5      | 0.2 ± 0.2      | 2.6 ± 0.6      |
| 8  | δ-2-Carene                               | 999  | -               | tr             | -                  | -             | -              | -              | -              |
| 9  | δ-3-Carene                               | 1009 | 0.1 ± 0.2       | 0.2 ± 0.4      | -                  | -             | -              | -              | -              |
| 10 | α-Terpinene                              | 1015 | 0.2 ± 0.1       | 1 ± 0.4        | 0.3 ± 0.2          | 0.4 ± 0.2     | 1.1 ± 0.5      | 0.1 ± 0.2      | 0.4 ± 0.2      |
| 11 | p-Cymene                                 | 1023 | tr              | 0.7 ± 0.4      | -                  | tr            | 0.4 ± 0.1      | 0.1 ± 0.2      | tr             |
| 12 | Limonene                                 | 1026 | 0.8 ± 1.0       | 2.9 ± 1.3      | 1.1 ± 0.5          | 1.4 ± 0.9     | 1.6 ± 0.6      | 0.3 ± 0.3      | 1.0 ± 0.6      |
| 13 | 1,8-Cineole                              | 1030 | -               | tr             | tr                 | 0.2 ± 0.4     | 0.2 ± 0.3      | 0.1 ± 0.2      | 0.5 ± 0.8      |
| 14 | (E)-β-Ocimene                            | 1046 | tr              | -              | tr                 | tr            | -              | -              | 0.3 ± 0.2      |
| 15 | γ-Terpinene                              | 1058 | 0.3 ± 0.2       | 1.6 ± 0.7      | 0.5 ± 0.4          | 0.7 ± 0.3     | 1.9 ± 0.9      | 0.1 ± 0.2      | 0.7 ± 0.3      |
| 16 | cis-Sabinene hydrate                     | 1066 | 0.2 ± 0.1       | 0.7 ± 0.2      | 0.3 ± 0.1          | 0.3 ± 0.1     | 0.7 ± 0.3      | 0.2 ± 0.4      | 0.4 ± 0.1      |
| 17 | 2-Nonanone                               | 1090 | 0.1 ± 0.2       | -              | -                  | -             | -              | -              | -              |
| 18 | Terpinolene                              | 1090 | 0.1 ± 0.2       | 0.7 ± 0.1      | 0.5 ± 0.2          | 0.5 ± 0.2     | 0.7 ± 0.2      | -              | 0.5 ± 0.2      |
| 19 | trans-Sabinene hydrate                   | 1100 | 0.1 ± 0.2       | 0.6 ± 0.3      | 0.2 ± 0.1          | tr            | 0.5 ± 0.3      | 0.3 ± 0.4      | 0.2 ± 0.1      |
| 20 | Linalool                                 | 1102 | 0.5 ± 0.4       | 0.8 ± 0.3      | 0.5 ± 0.3          | 0.2 ± 0.2     | 0.4 ± 0.4      | 0.1 ± 0.2      | 0.4 ± 0.3      |
| 21 | cis-Thujone                              | 1107 | 0.6 ± 0.7       | 0.2 ± 0.2      | 1.9 ± 2            | 0.1 ± 0.3     | 0.6 ± 0.5      | 0.6 ± 0.4      | 0.2 ± 0.3      |
| 22 | trans-Thujone                            | 1117 | 0.6 ± 0.5       | 1.8 ± 1.6      | 0.7 ± 0.7          | 0.5 ± 0.8     | 0.8 ± 0.6      | 0.6 ± 0.4      | 0.5 ± 0.8      |
| 23 | trans-p-Mentha-2,8-dien-1-ol             | 1122 | -               | 0.3 ± 0.1      | 0.2 ± 0.4          | tr            | 0.3 ± 0.1      | tr             | 0.2 ± 0.4      |
| 24 | iso-3-Thujanol                           | 1134 | tr              | tr             | -                  | -             | -              | 0.1 ± 0.2      | tr             |
| 25 | trans-Sabinol                            | 1142 | 3.3 ± 3.1       | 1.3 ± 0.9      | 0.5 ± 0.4          | tr            | 3.3 ± 2        | 6.5 ± 3.0      | 0.2 ± 0.2      |
| 26 | Camphore                                 | 1144 | -               | tr             | -                  | -             | -              | -              | -              |
| 27 | Citronellal                              | 1152 | -               | tr             | 0.2 ± 0.1          | -             | -              | -              | tr             |
| 28 | Borneol                                  | 1164 | 0.2 ± 0.3       | 0.2 ± 0.2      | tr                 | 0.1 ± 0.4     | -              | -              | -              |
| 29 | Terpinen-4-ol                            | 1175 | 0.9 ± 0.4       | 5.4 ± 2.5      | 1.6 ± 1            | 1.4 ± 0.7     | 7.3 ± 2.9      | 1.0 ± 1.2      | 1.6 ± 0.6      |
| 30 | α-Terpineol                              | 1189 | -               | 0.2 ± 0.1      | tr                 | -             | 0.2 ± 0.1      | -              | tr             |
| 31 | cis-Piperitol                            | 1194 | -               | tr             | -                  | -             | tr             | -              | -              |
| 32 | trans-Piperitol                          | 1206 | -               | tr             | -                  | -             | tr             | -              | -              |
| 33 | Coahuilensol, methyl ether               | 1222 | -               | -              | -                  | -             | -              | -              | tr             |
| 34 | Citronellol                              | 1227 | 0.4 ± 0.5       | 0.6 ± 0.8      | 0.8 ± 0.7          | 1.4 ± 0.7     | 1.0 ± 0.7      | tr             | 0.6 ± 0.5      |
| 35 | trans-Sabinene hydrate acetate           | 1250 | tr              | -              | tr                 | tr            | -              | -              | tr             |
| 36 | Linalool acetate                         | 1253 | tr              | tr             | 0.3 ± 0.2          | tr            | tr             | tr             | 0.2 ± 0.2      |
| 37 | Methyl citronellate                      | 1258 | 0.8 ± 0.7       | 1.0 ± 0.9      | 3.4 ± 1.4          | 3.2 ± 1.2     | 3.0 ± 1.3      | 0.5 ± 0.8      | 1.6 ± 1.0      |
| 38 | Bornyl acetate                           | 1283 | 1.9 ± 3         | 6.1 ± 5.5      | 1.5 ± 3.4          | 1.1 ± 2.6     | tr             | tr             | -              |
| 39 | trans-Linalool oxide acetate (pyranoid)  | 1286 | -               | tr             | -                  | -             | -              | -              | -              |
| 40 | 2-Undecanone                             | 1292 | 0.1 ± 0.2       | 0.8 ± 1.1      | -                  | 0.1 ± 0.3     | -              | -              | -              |
| 41 | trans-Sabinyl acetate                    | 1296 | 23.7 ± 16.9     | 12.5 ± 11.4    | 31.9 ± 21.5        | 9.9 ± 14.5    | 18.1 ± 13.7    | 39.7 ± 14.5    | 13.7 ± 15.2    |
| 42 | Methyl geranate                          | 1323 | 0.2 ± 0.4       | 0.2 ± 0.3      | 0.4 ± 0.5          | 0.2 ± 0.2     | 0.4 ± 0.4      | -              | tr             |
| 43 | α-Copaene                                | 1373 | tr              | -              | -                  | 0.1 ± 0.2     | 0.2 ± 0.1      | tr             | tr             |
| 44 | β-Cubebene                               | 1388 | tr              | -              | -                  | -             | -              | -              | -              |
| 45 | β-Elemene                                | 1390 | tr              | -              | -                  | tr            | -              | tr             | -              |
| 46 | (Z,E)-2,4-Decadienoic acid, methyl ester | 1395 | 0.1 ± 0.2       | tr             | -                  | 0.1 ± 0.2     | 0.2 ± 0.2      | tr             | 0.2 ± 0.2      |
| 47 | Sibirene                                 | 1400 | -               | tr             | -                  | -             | -              | -              | tr             |
| 48 | Methyl eugenol                           | 1404 | 0.8 ± 1.4       | -              | -                  | -             | 0.2 ± 0.8      | 1.3 ± 1.8      | 0.4 ± 1.1      |
| 49 | (E)-Caryophyllene                        | 1417 | 0.3 ± 0.1       | 0.3 ± 0.1      | 0.2 ± 0.1          | 0.4 ± 0.2     | 0.3 ± 0.1      | 0.4 ± 0.4      | 0.3 ± 0.1      |
| 50 | cis-Murola-3,5-diene                     | 1446 | -               | tr             | -                  | -             | -              | -              | -              |
| 51 | trans-Murola-3,5-diene                   | 1449 | 0.1 ± 0.2       | -              | -                  | 0.1 ± 0.2     | 0.2 ± 0.2      | -              | -              |
| 52 | α-Humulene                               | 1452 | 0.2 ± 0.1       | tr             | tr                 | 0.3 ± 0.2     | 0.2 ± 0.1      | tr             | tr             |
| 53 | cis-Murola-4(14),5-diene                 | 1461 | -               | 0.1 ± 0.2      | -                  | tr            | tr             | -              | -              |
| 54 | trans-Cadina-1(6),4-diene                | 1472 | 0.2 ± 0.3       | -              | -                  | 0.2 ± 0.4     | 0.4 ± 0.3      | -              | tr             |
| 55 | γ-Murolene                               | 1475 | tr              | tr             | tr                 | 0.1 ± 0.3     | tr             | tr             | tr             |
| 56 | Germacrene D                             | 1480 | 1.3 ± 1.0       | 0.8 ± 0.2      | 1.1 ± 0.4          | 0.6 ± 0.7     | 0.7 ± 0.4      | 0.3 ± 0.2      | 0.9 ± 0.5      |
| 57 | ar-Curcumene                             | 1484 | tr              | -              | -                  | 0.5 ± 0.6     | -              | tr             | 0.3 ± 0.7      |
| 58 | trans-Murola-4(14),5-diene               | 1491 | 0.3 ± 0.5       | -              | -                  | 0.3 ± 0.5     | 0.6 ± 0.5      | -              | -              |
| 59 | epi-Cubebol                              | 1493 | 0.3 ± 0.2       | tr             | tr                 | tr            | -              | tr             | tr             |
| 60 | cis-Cadina-1,4-diene                     | 1494 | -               | 0.2 ± 0.1      | -                  | 0.2 ± 0.2     | 0.4 ± 0.2      | -              | tr             |
| 61 | Bicyclgermacrene                         | 1496 | -               | -              | -                  | -             | -              | -              | tr             |
| 62 | Epizonarene                              | 1499 | -               | tr             | -                  | -             | tr             | -              | -              |
| 63 | α-Murolene                               | 1499 | 0.3 ± 0.1       | 0.4 ± 0.1      | 0.4 ± 0.1          | 0.4 ± 0.1     | 0.4 ± 0.1      | 0.2 ± 0.1      | 0.4 ± 0.1      |
| 64 | Germacrene A                             | 1504 | -               | tr             | tr                 | tr            | tr             | -              | tr             |
| 65 | (E,E)-α-Farnesene                        | 1511 | 0.2 ± 0.2       | -              | -                  | -             | -              | -              | -              |
| 66 | γ-Cadinene                               | 1514 | 1.3 ± 1.6       | 0.8 ± 0.2      | 0.4 ± 0.1          | 1.1 ± 1.4     | 1.4 ± 0.7      | 0.6 ± 0.3      | 0.4 ± 0.1      |
| 67 | δ-Cadinene                               | 1524 | 2.4 ± 0.9       | 2.1 ± 0.4      | 2.7 ± 0.7          | 2.5 ± 0.8     | 2.0 ± 0.3      | 1.5 ± 0.8      | 2.4 ± 0.8      |
| 68 | Zonarene                                 | 1525 | 0.2 ± 0.3       | tr             | -                  | 0.2 ± 0.4     | 0.4 ± 0.4      | -              | -              |
| 69 | trans-Cadina-1,4-diene                   | 1531 | tr              | -              | tr                 | tr            | tr             | tr             | -              |
| 70 | α-Cadinene                               | 1537 | tr              | tr             | tr                 | tr            | tr             | tr             | tr             |
| 71 | Elemol                                   | 1549 | 0.7 ± 0.7       | 0.3 ± 0.4      | 0.3 ± 0.3          | 0.3 ± 0.2     | 0.6 ± 0.4      | 2.8 ± 1.5      | 0.5 ± 0.5      |
| 72 | Germacrene B                             | 1556 | 0.8 ± 0.7       | 0.5 ± 0.3      | 0.7 ± 0.7          | 0.6 ± 0.5     | 0.5 ± 0.5      | 0.2 ± 0.6      | 1.2 ± 1.0      |
| 73 | Elemicin                                 | 1558 | 0.5 ± 1.2       | -              | -                  | -             | -              | 3.9 ± 2.2      | 0.4 ± 1.4      |
| 74 | Germacrene D-4-ol                        | 1577 | 4.9 ± 2.9       | 3.8 ± 1.0      | 6.3 ± 2.1          | 5.8 ± 2.0     | 1.8 ± 1.1      | 2.7 ± 1.5      | 6.9 ± 2.2      |
| 75 | Caryophyllene oxide                      | 1582 | 0.2 ± 0.1       | tr             | tr                 | 0.6 ± 0.9     | 0.5 ± 0.4      | 0.3 ± 0.5      | tr             |
| 76 | Cedrol                                   | 1600 | -               | -              | -                  | -             | -              | tr             | -              |
| 77 | β-Oplophenone                            | 1608 | 0.9 ± 0.4       | 1 ± 0.2        | 0.5 ± 0.2          | 1.2 ± 0.4     | 0.8 ± 0.4      | 1.1 ± 0.5      | 0.8 ± 0.3      |
| 78 | 1,10-di-epi-Cubenol                      | 1615 | -               | -              | tr                 | tr            | tr             | -              | -              |
| 79 | 10-epi-γ-Eudesmol                        | 1620 | -               | -              | tr                 | -             | tr             | tr             | -              |
| 80 | 1-epi-Cubenol                            | 1628 | 0.8 ± 0.9       | 0.3 ± 0.1      | 0.2 ± 0.1          | 0.6 ± 0.7     | 1.0 ± 0.7      | 0.2 ± 0.1      | 0.2 ± 0.1      |
| 81 | γ-Eudesmol                               | 1631 | tr              | 0.1 ± 0.2      | 0.2 ± 0.6          | -             | 0.3 ± 0.2      | 0.2 ± 0.1      | tr             |
| 82 | τ-Murolol                                | 1641 | 1.5 ± 0.5       | 1.9 ± 0.4      | 1.7 ± 0.6          | 1.5 ± 0.5     | 1.8 ± 0.6      | 0.9 ± 0.4      | 1.7 ± 0.5      |
| 83 | α-Murolol (ε-torreyol)                   | 1645 | 0.3 ± 0.1       | 0.4 ± 0.1      | 0.3 ± 0.1          | 0.3 ± 0.1     | 0.4 ± 0.1      | 0.2 ± 0.1      | 0.3 ± 0.1      |
| 84 | β-Eudesmol                               | 1649 | tr              | 0.1 ± 0.3      | tr                 | -             | 0.4 ± 0.3      | 0.4 ± 0.2      | tr             |
| 85 | α-Cadinol                                | 1655 | 2.9 ± 1.1       | 3.4 ± 0.5      | 3.9 ± 1.1          | 3.3 ± 1.0     | 2.9 ± 1.1      | 2.1 ± 0.7      | 3.6 ± 1.0      |
| 86 | Bulnesol                                 | 1672 | -               | tr             | tr                 | tr            | tr             | tr             | tr             |
| 87 | Germacrene-4(15),5,10(14)-trien-1-α-ol   | 1685 | tr              | tr             | -                  | tr            | -              | -              | 0.3 ± 0.4      |
| 88 | Shyobunol                                | 1690 | 0.4 ± 0.2       | 0.2 ± 0.2      | 0.2 ± 0.1          | 0.2 ± 0.2     | 0.2 ± 0.5      | 0.3 ± 0.1      | 0.5 ± 0.2      |
| 89 | Amorpha-4,9-dien-2-ol                    | 1703 | tr              | -              | -                  | -             | -              | tr             | -              |
| 90 | 14-hydroxy-α-Humulene                    | 1717 | tr              | -              | -                  | -             | -              | tr             | tr             |
| 91 | (2Z,6E)-Farnesol                         | 1725 | -               | 0.1 ± 0.2      | 0 ± 0.2            | tr            | -              | -              | -              |
| 92 | Oplopanone                               | 1738 | 0.2 ± 0.1       | tr             | tr                 | tr            | -              | 0.2 ± 0.1      | tr             |

|                                   |                                                  |      |                    |                   |                   |                    |                   |                    |                    |
|-----------------------------------|--------------------------------------------------|------|--------------------|-------------------|-------------------|--------------------|-------------------|--------------------|--------------------|
| 93                                | (2 <i>E</i> ,6 <i>E</i> )-Farnesol               | 1744 | -                  | tr                | tr                | tr                 | -                 | -                  | -                  |
| 94                                | <i>ent</i> -Rosa-1,5-diene                       | 2010 | 0.2 ± 0            | tr                | tr                | tr                 | tr                | tr                 | 0.2 ± 0.1          |
| 95                                | Abieta-8,12-diene                                | 2015 | tr                 | tr                | -                 | tr                 | tr                | tr                 | 0.2 ± 0.1          |
| 96                                | Abietatriene                                     | 2046 | 0.2 ± 0.1          | tr                | tr                | tr                 | 0.2 ± 0.5         | tr                 | tr                 |
| 97                                | Abietadiene                                      | 2067 | 1.5 ± 0.5          | 1.0 ± 0.6         | 0.5 ± 0.3         | 1.4 ± 0.9          | 1.2 ± 0.7         | 1.2 ± 0.3          | 2.3 ± 1.5          |
| 98                                | Abieta-8(14),13(15)-diene                        | 2134 | tr                 | tr                | -                 | tr                 | tr                | tr                 | 0.2 ± 0.2          |
| 99                                | Sandracopimarinal                                | 2180 | 0.5 ± 0.3          | 0.2 ± 0.1         | tr                | 0.2 ± 0.1          | tr                | 0.4 ± 0.3          | 0.2 ± 0.1          |
| 100                               | 13- $\beta$ -methyl-13-vinyl-Podocarp-7-en-3-one | 2186 | 0.8 ± 0.6          | 0.4 ± 0.2         | tr                | 0.3 ± 0.2          | 0.3 ± 0.1         | 0.2 ± 0.2          | 0.4 ± 0.2          |
| 101                               | Unknown DO #1 (81, 91, 105, 119, 135)            | 2220 | 0.5 ± 0.4          | tr                | tr                | tr                 | 0.2 ± 0.2         | 0.4 ± 0.2          | 0.2 ± 0.2          |
| 102                               | Unknown DO #2 (286, 253, 271, 91)                | 2227 | 1.1 ± 0.6          | 0.4 ± 0.2         | 0.2 ± 0.1         | 0.7 ± 0.5          | 0.4 ± 0.2         | 0.6 ± 0.3          | 0.7 ± 0.4          |
| 103                               | Unknown DO #3 (91, 133, 105, 286)                | 2233 | 0.5 ± 0.3          | 0.2 ± 0.1         | tr                | 0.3 ± 0.3          | 0.3 ± 0.2         | 0.5 ± 0.3          | 0.4 ± 0.2          |
| 104                               | Sempervirol                                      | 2241 | 1.5 ± 0.7          | 0.3 ± 0.3         | 0.3 ± 0.1         | 0.8 ± 0.6          | 0.4 ± 0.3         | 0.9 ± 0.5          | 0.8 ± 0.5          |
| 105                               | Unknown DO #4 (91, 135, 286, 105, 271)           | 2245 | 0.8 ± 0.4          | 0.2 ± 0.1         | 0.2 ± 0.1         | 0.4 ± 0.3          | 0.2 ± 0.2         | 0.5 ± 0.4          | 0.5 ± 0.3          |
| 106                               | <i>dehydro</i> -Abietal                          | 2273 | 1.2 ± 0.9          | 0.3 ± 0.1         | tr                | 0.2 ± 0.2          | 0.2 ± 0.1         | 0.8 ± 0.6          | 0.3 ± 0.3          |
| 107                               | 4- <i>epi</i> -Abietal                           | 2300 | 7.6 ± 4.8          | 2.6 ± 1.1         | 1.2 ± 0.6         | 4.6 ± 3.7          | 3.0 ± 1.7         | 5.1 ± 2.8          | 4.3 ± 3.0          |
| 108                               | Abieta-7,13-dien-3-one                           | 2316 | 9.5 ± 5.4          | 2.8 ± 2.2         | 2.0 ± 0.8         | 5.3 ± 4.5          | 4.2 ± 3.0         | 7.2 ± 4.8          | 5.2 ± 3.6          |
| 109                               | Abietal                                          | 2318 | tr                 | -                 | -                 | tr                 | -                 | 0.1 ± 0.2          | -                  |
| 110                               | <i>trans</i> -Feruginol                          | 2333 | tr                 | -                 | tr                | -                  | -                 | 0.3 ± 0.4          | -                  |
| 111                               | 4- <i>epi</i> -Abietol                           | 2347 | 0.5 ± 0.3          | tr                | tr                | 0.4 ± 0.3          | 0.3 ± 0.5         | 0.5 ± 0.7          | 0.3 ± 0.2          |
| 112                               | <i>cis</i> -Feruginol                            | 2370 | 0.7 ± 0.7          | 0.2 ± 0.1         | tr                | 0.4 ± 0.3          | 0.3 ± 0.2         | 0.5 ± 0.5          | 0.4 ± 0.3          |
| 113                               | <i>neo</i> -Abietol                              | 2386 | 0.6 ± 0.3          | 0.2 ± 0.1         | tr                | 0.4 ± 0.3          | 0.3 ± 0.2         | 0.4 ± 0.3          | 0.4 ± 0.3          |
| 114                               | Abietol                                          | 2399 | 0.9 ± 0.8          | -                 | -                 | 0.4 ± 0.6          | 0.1 ± 0.3         | 0.4 ± 0.8          | 0.3 ± 0.4          |
| <b>Total monoterpenes</b>         |                                                  |      | <b>46.4 ± 19.7</b> | <b>71.1 ± 7.4</b> | <b>73.8 ± 5.9</b> | <b>59.9 ± 13.7</b> | <b>67.9 ± 8.0</b> | <b>58.5 ± 11.4</b> | <b>59.2 ± 9.5</b>  |
| <i>Monoterpene hydrocarbons</i>   |                                                  |      | 11.9 ± 16.4        | 38.7 ± 10.0       | 28.9 ± 19.7       | 40.7 ± 14.9        | 30.3 ± 13.0       | 6.9 ± 8.8          | 37.8 ± 14.5        |
| <i>Oxygenated monoterpenes</i>    |                                                  |      | 34.5 ± 18.1        | 32.4 ± 14.7       | 44.9 ± 22.7       | 19.2 ± 16.4        | 37.6 ± 14.1       | 51.6 ± 16.1        | 21.4 ± 16.3        |
| <b>Total sesquiterpenes</b>       |                                                  |      | <b>22.3 ± 8.8</b>  | <b>18.0 ± 1.7</b> | <b>20.2 ± 4.9</b> | <b>22.4 ± 6.7</b>  | <b>19.4 ± 2.5</b> | <b>15.8 ± 4.6</b>  | <b>22.3 ± 5.0</b>  |
| <i>Sesquiterpene hydrocarbons</i> |                                                  |      | 9.0 ± 4.3          | 6.2 ± 1.2         | 6.4 ± 1.7         | 8.3 ± 4.3          | 9.1 ± 2.1         | 6.8 ± 2.0          | 7.3 ± 2.0          |
| <i>Oxygenated sesquiterpenes</i>  |                                                  |      | 13.3 ± 5.3         | 11.8 ± 1.7        | 13.8 ± 3.3        | 14.0 ± 3.7         | 10.3 ± 2.5        | 9.1 ± 2.9          | 14.9 ± 3.3         |
| <b>Total diterpenes</b>           |                                                  |      | <b>28.7 ± 16.0</b> | <b>9.3 ± 5.3</b>  | <b>5.4 ± 2.0</b>  | <b>16.5 ± 12.8</b> | <b>11.9 ± 7.2</b> | <b>20.2 ± 12.2</b> | <b>17.4 ± 11.1</b> |
| <i>Diterpene hydrocarbons</i>     |                                                  |      | 2.0 ± 0.7          | 1.4 ± 0.8         | 0.7 ± 0.3         | 1.8 ± 1.0          | 1.7 ± 0.8         | 1.6 ± 0.4          | 3.0 ± 1.8          |
| <i>Oxygenated diterpenes</i>      |                                                  |      | 26.6 ± 15.7        | 7.9 ± 4.6         | 4.7 ± 1.8         | 14.7 ± 11.9        | 10.2 ± 6.7        | 18.6 ± 11.9        | 14.4 ± 9.5         |
| <b>Other</b>                      |                                                  |      | <b>0.8 ± 1.3</b>   | <b>0.9 ± 1.2</b>  | <b>tr</b>         | <b>0.2 ± 0.3</b>   | <b>0.2 ± 0.2</b>  | <b>3.9 ± 2.1</b>   | <b>0.6 ± 1.4</b>   |
| <b>TOTAL</b>                      |                                                  |      | <b>98.1 ± 1.1</b>  | <b>99.4 ± 0.2</b> | <b>99.5 ± 0.2</b> | <b>99.0 ± 0.8</b>  | <b>99.4 ± 0.4</b> | <b>98.4 ± 0.8</b>  | <b>99.4 ± 0.2</b>  |
| Number of compounds               |                                                  |      | 66 - 85            | 79 - 85           | 79 - 87           | 73 - 83            | 79 - 89           | 62 - 84            | 70 - 88            |

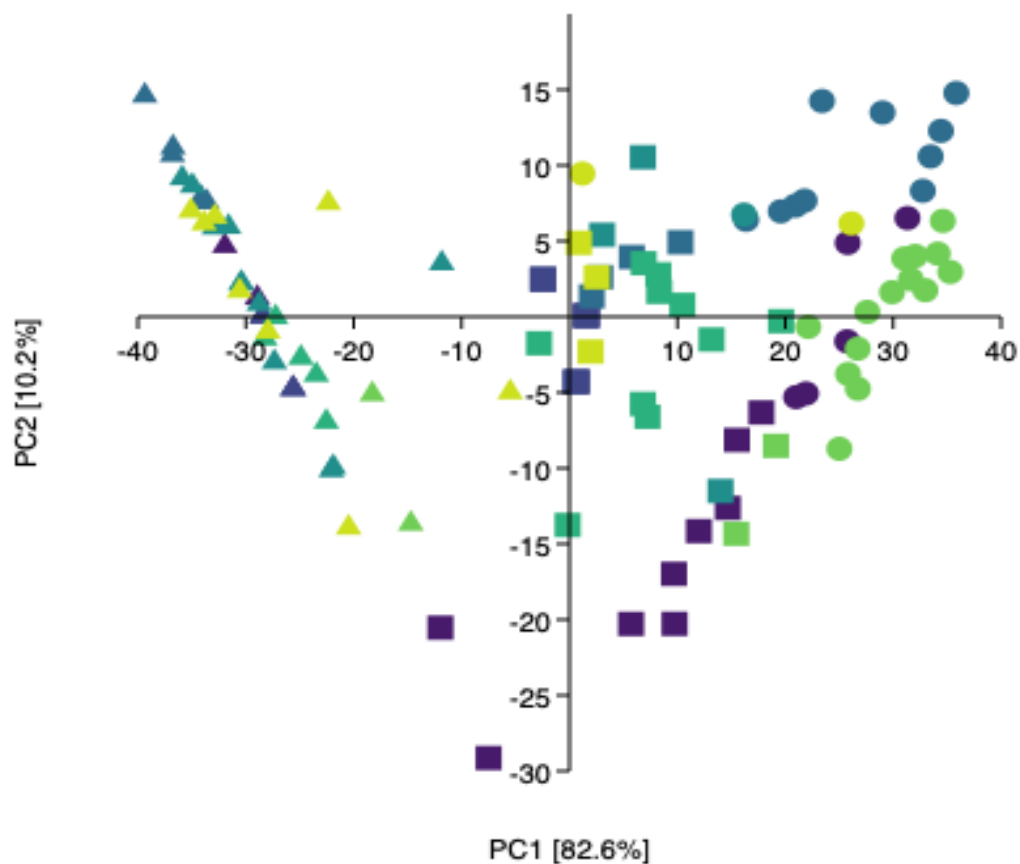

**Supplemental figure S1.** PCA scatter plot of leaf essential oil composition of *Juniperus sabina* var. *balkanensis*; colour represent populations, shapes chemotypes/dominant compounds

■ – Central Balkan, ■ – Resava gorge, ■ – Mt. Bistra, ■ – Mt. Korab, ■ – Mt. Prokletije, ■ – Mt. Biokovo, ■ – Mt. Velebit.

triangle – sabinene chemotype, square – intermediate chemotype, dot – *trans*-sabinyl acetate chemotype

**Supplemental Table S2.** Pairwise Hotelling's  $p$  values between EO composition of the studied populations of *Juniperus sabina* var. *balkanensis* from the Balkans

|                 | Mt. Velebit | Biokovo | Mt. Prokletije | Mt. Korab | Mt. Bistra | Resava gorge | Balkan Mountain |
|-----------------|-------------|---------|----------------|-----------|------------|--------------|-----------------|
| Mt. Velebit     |             | 0.00852 | 0.00013        | 0.01827   | 0.00161    | 0.00269      | 0.12205         |
| Biokovo         | 0.00852     |         | 0.00003        | 0.00776   | 0.10190    | 0.00003      | 0.04831         |
| Mt. Prokletije  | 0.00013     | 0.00003 |                | 0.00226   | 0.00002    | 0.00000      | 0.01655         |
| Mt. Korab       | 0.01827     | 0.00776 | 0.00226        |           | 0.00184    | 0.00020      | 0.49557         |
| Mt. Bistra      | 0.00161     | 0.10190 | 0.00002        | 0.00184   |            | 0.00002      | 0.01575         |
| Resava gorge    | 0.00269     | 0.00003 | 0.00000        | 0.00020   | 0.00002    |              | 0.00183         |
| Balkan Mountain | 0.12205     | 0.04831 | 0.01655        | 0.49557   | 0.01575    | 0.00183      |                 |

Supplemental table S3. Correlation between environmental parameters and mean population values of leaf essential oil of *Juniperus sabina* var. *balkanensis*

|                               | Altitude    | Inclination  | Exposition   | BIO1         | BIO2         | BIO3         | BIO4         | BIO5         | BIO6         | BIO7         | BIO8         | BIO9        | BIO10        | BIO11        | BIO12        | BIO13        | BIO14       | BIO15       | BIO16        | BIO17        | BIO18        | BIO19        |
|-------------------------------|-------------|--------------|--------------|--------------|--------------|--------------|--------------|--------------|--------------|--------------|--------------|-------------|--------------|--------------|--------------|--------------|-------------|-------------|--------------|--------------|--------------|--------------|
| $\alpha$ -Pinene              | -0.18       | -0.15        | -0.56        | -0.35        | -0.49        | -0.37        | <b>-0.67</b> | -0.46        | -0.20        | -0.52        | -0.40        | 0.15        | -0.42        | -0.20        | 0.17         | 0.25         | 0.02        | 0.32        | 0.26         | 0.08         | -0.44        | 0.21         |
| Sabinene                      | 0.29        | -0.45        | -0.11        | -0.57        | -0.12        | -0.17        | -0.29        | -0.55        | -0.57        | -0.09        | -0.41        | -0.10       | -0.58        | -0.52        | 0.22         | 0.09         | 0.39        | -0.14       | 0.16         | 0.34         | 0.20         | 0.20         |
| Myrcene                       | 0.22        | -0.49        | -0.42        | -0.35        | -0.27        | -0.21        | -0.52        | -0.39        | -0.27        | -0.28        | -0.50        | 0.27        | -0.40        | -0.23        | 0.38         | 0.38         | 0.26        | 0.20        | 0.43         | 0.35         | -0.28        | 0.39         |
| Limonene                      | -0.22       | -0.25        | <b>-0.62</b> | -0.14        | <b>-0.64</b> | -0.47        | <b>-0.82</b> | -0.31        | 0.08         | <b>-0.69</b> | -0.43        | 0.44        | -0.25        | 0.06         | 0.30         | 0.41         | 0.03        | 0.37        | 0.42         | 0.20         | <b>-0.63</b> | 0.31         |
| <i>cis</i> -Thujone           | 0.21        | -0.35        | 0.03         | 0.24         | 0.32         | 0.10         | 0.41         | 0.35         | 0.13         | 0.43         | -0.04        | 0.38        | 0.28         | 0.14         | 0.37         | 0.40         | 0.25        | -0.09       | 0.37         | 0.26         | -0.08        | 0.37         |
| <i>trans</i> -Thujone         | -0.60       | -0.16        | <b>-0.76</b> | 0.21         | <b>-0.72</b> | <b>-0.62</b> | <b>-0.68</b> | 0.00         | 0.44         | <b>-0.71</b> | -0.08        | 0.43        | 0.11         | 0.40         | 0.06         | 0.24         | -0.27       | 0.40        | 0.21         | -0.06        | <b>-0.69</b> | 0.05         |
| <i>trans</i> -Sabinol         | -0.39       | <b>0.75</b>  | 0.15         | 0.32         | 0.10         | 0.19         | 0.24         | 0.30         | 0.31         | 0.04         | 0.38         | -0.18       | 0.33         | 0.26         | -0.37        | -0.24        | -0.44       | 0.16        | -0.33        | -0.51        | -0.13        | -0.30        |
| Terpinen-4-ol                 | 0.01        | 0.25         | -0.51        | -0.08        | -0.16        | 0.12         | -0.48        | -0.14        | 0.03         | -0.31        | -0.36        | 0.33        | -0.14        | 0.03         | 0.20         | 0.44         | -0.20       | <b>0.74</b> | 0.39         | -0.13        | <b>-0.81</b> | 0.36         |
| Citronellol                   | 0.51        | -0.09        | 0.31         | <b>-0.79</b> | -0.10        | 0.02         | -0.44        | <b>-0.73</b> | <b>-0.74</b> | -0.17        | <b>-0.87</b> | 0.21        | <b>-0.80</b> | <b>-0.72</b> | <b>0.70</b>  | 0.57         | <b>0.76</b> | -0.20       | <b>0.62</b>  | <b>0.69</b>  | 0.00         | <b>0.71</b>  |
| Methyl citronellate           | <b>0.60</b> | -0.18        | 0.32         | <b>-0.64</b> | 0.19         | 0.18         | -0.08        | -0.50        | <b>-0.69</b> | 0.18         | <b>-0.74</b> | 0.22        | <b>-0.61</b> | <b>-0.66</b> | <b>0.70</b>  | 0.60         | <b>0.74</b> | -0.19       | <b>0.62</b>  | <b>0.63</b>  | 0.04         | <b>0.74</b>  |
| Bornyl acetate                | -0.53       | -0.39        | <b>-0.61</b> | 0.21         | <b>-0.83</b> | <b>-0.75</b> | <b>-0.75</b> | -0.03        | 0.46         | <b>-0.79</b> | -0.14        | 0.52        | 0.09         | 0.41         | 0.18         | 0.26         | -0.06       | 0.13        | 0.28         | 0.20         | -0.52        | 0.09         |
| <i>trans</i> -Sabinyl acetate | -0.26       | 0.22         | 0.17         | 0.40         | 0.29         | 0.09         | 0.60         | 0.46         | 0.28         | 0.39         | 0.45         | -0.11       | 0.46         | 0.25         | -0.22        | -0.18        | -0.20       | -0.15       | -0.25        | -0.28        | 0.14         | -0.22        |
| Germacrene D                  | 0.53        | <b>-0.74</b> | -0.21        | 0.56         | 0.23         | 0.22         | 0.09         | 0.59         | 0.54         | 0.22         | -0.03        | <b>0.70</b> | 0.54         | 0.58         | 0.38         | 0.46         | 0.09        | 0.23        | 0.50         | 0.35         | -0.31        | 0.36         |
| $\gamma$ -Cadinene            | 0.33        | 0.51         | 0.34         | -0.22        | -0.12        | 0.29         | -0.50        | -0.26        | -0.07        | -0.36        | -0.60        | 0.44        | -0.28        | -0.11        | 0.50         | 0.56         | 0.26        | 0.24        | 0.54         | 0.33         | -0.46        | 0.57         |
| Elemol                        | -0.52       | <b>0.65</b>  | 0.21         | 0.19         | 0.13         | 0.04         | 0.44         | 0.19         | 0.11         | 0.17         | 0.58         | -0.56       | 0.23         | 0.07         | <b>-0.62</b> | -0.60        | -0.44       | -0.13       | <b>-0.67</b> | <b>-0.61</b> | 0.29         | <b>-0.60</b> |
| Germacrene B                  | <b>0.67</b> | <b>-0.68</b> | -0.14        | 0.21         | 0.43         | 0.38         | 0.25         | 0.31         | 0.09         | 0.42         | 0.11         | 0.08        | 0.24         | 0.18         | 0.00         | -0.03        | -0.01       | 0.16        | 0.05         | 0.10         | 0.15         | 0.00         |
| Germacrene D-4-ol             | 0.33        | <b>-0.80</b> | 0.10         | -0.05        | 0.15         | -0.12        | 0.24         | 0.02         | -0.15        | 0.29         | 0.08         | -0.10       | -0.01        | -0.09        | 0.05         | -0.17        | 0.32        | -0.47       | -0.07        | 0.34         | 0.58         | -0.09        |
| $\beta$ -Oplophenone          | -0.53       | 0.50         | 0.22         | -0.40        | -0.60        | -0.46        | -0.50        | -0.55        | -0.24        | <b>-0.64</b> | -0.05        | -0.40       | -0.45        | -0.30        | -0.26        | -0.39        | -0.01       | -0.32       | -0.37        | -0.08        | 0.26         | -0.34        |
| $\alpha$ -Cadinol             | 0.43        | <b>-0.88</b> | -0.30        | -0.07        | 0.04         | -0.10        | -0.09        | -0.03        | -0.11        | 0.11         | -0.26        | 0.31        | -0.08        | -0.04        | 0.37         | 0.31         | 0.33        | -0.01       | 0.39         | 0.44         | -0.01        | 0.33         |
| Abietadiene                   | 0.27        | 0.02         | 0.02         | 0.07         | 0.37         | 0.41         | 0.28         | 0.12         | -0.05        | 0.31         | 0.42         | -0.55       | 0.10         | 0.02         | -0.57        | <b>-0.61</b> | -0.39       | 0.15        | -0.57        | -0.43        | 0.38         | -0.54        |
| Abieta-7,13-dien-3-one        | 0.06        | 0.40         | 0.48         | 0.27         | 0.18         | 0.30         | 0.23         | 0.27         | 0.25         | 0.09         | 0.31         | -0.15       | 0.28         | 0.23         | -0.26        | -0.30        | -0.17       | -0.13       | -0.30        | -0.16        | 0.25         | -0.29        |
